# Supplementary material for: Effects of evolutionary history on genome wide and phenotypic convergence in Drosophila populations
Source: BMC Genomics. 2018 Oct 11;19:743. doi: 10.1186/s12864-018-5118-7 (PMC6180417; doi:10.1186/s12864-018-5118-7)
Supplement: Supplementary file 5 — Fungal Resistance Data. Survivorship and mortality data for TDO and TSO cohorts exposed to the fungal pathogen Beauveria bassiana, and control cohorts not exposed to the fungus. (XLSX 19 kb) [file 12864_2018_5118_MOESM5_ESM.xlsx]

## Sheet: Sheet1
regime	treatment	replicate	day	dead	alive
TSO	control	1	1	10	243
TSO	control	1	2	18	233
TSO	control	1	3	23	225
TSO	control	1	4	24	220
TSO	control	1	5	24	219
TSO	control	1	6	24	219
TSO	control	1	7	24	219
TSO	control	1	8	26	219
TSO	control	1	9	26	217
TSO	control	1	10	27	217
TSO	control	1	11	29	216
TSO	control	1	12	29	214
TSO	control	1	13	32	214
TSO	control	1	14	29	211
TSO	control	1	15	35	210
TSO	control	1	16	35	208
TSO	control	1	17	41	208
TSO	control	1	18	47	202
TSO	control	1	19	53	196
TSO	control	1	20	66	190
TSO	control	2	1	0	231
TSO	control	2	2	5	231
TSO	control	2	3	6	226
TSO	control	2	4	10	225
TSO	control	2	5	12	221
TSO	control	2	6	16	219
TSO	control	2	7	17	215
TSO	control	2	8	18	214
TSO	control	2	9	19	213
TSO	control	2	10	19	212
TSO	control	2	11	20	212
TSO	control	2	12	23	211
TSO	control	2	13	27	208
TSO	control	2	14	23	204
TSO	control	2	15	29	204
TSO	control	2	16	30	202
TSO	control	2	17	32	201
TSO	control	2	18	36	199
TSO	control	2	19	41	195
TSO	control	2	20	45	190
TSO	control	3	1	4	277
TSO	control	3	2	6	273
TSO	control	3	3	8	271
TSO	control	3	4	8	269
TSO	control	3	5	8	269
TSO	control	3	6	9	269
TSO	control	3	7	9	268
TSO	control	3	8	11	268
TSO	control	3	9	16	266
TSO	control	3	10	17	261
TSO	control	3	11	19	260
TSO	control	3	12	19	258
TSO	control	3	13	22	258
TSO	control	3	14	19	255
TSO	control	3	15	25	254
TSO	control	3	16	26	252
TSO	control	3	17	29	251
TSO	control	3	18	30	248
TSO	control	3	19	34	247
TSO	control	3	20	42	243
TSO	control	4	1	2	174
TSO	control	4	2	4	172
TSO	control	4	3	5	170
TSO	control	4	4	5	169
TSO	control	4	5	5	169
TSO	control	4	6	6	169
TSO	control	4	7	7	168
TSO	control	4	8	8	167
TSO	control	4	9	8	166
TSO	control	4	10	8	166
TSO	control	4	11	11	166
TSO	control	4	12	12	163
TSO	control	4	13	12	162
TSO	control	4	14	12	162
TSO	control	4	15	14	161
TSO	control	4	16	16	160
TSO	control	4	17	18	158
TSO	control	4	18	21	156
TSO	control	4	19	23	153
TSO	control	4	20	24	151
TSO	control	5	1	3	246
TSO	control	5	2	6	243
TSO	control	5	3	7	240
TSO	control	5	4	7	239
TSO	control	5	5	7	239
TSO	control	5	6	7	239
TSO	control	5	7	7	239
TSO	control	5	8	10	239
TSO	control	5	9	11	236
TSO	control	5	10	11	235
TSO	control	5	11	12	235
TSO	control	5	12	13	234
TSO	control	5	13	14	233
TSO	control	5	14	13	232
TSO	control	5	15	15	232
TSO	control	5	16	20	231
TSO	control	5	17	28	226
TSO	control	5	18	30	218
TSO	control	5	19	35	216
TSO	control	5	20	40	211
TSO	fungus	6	1	2	247
TSO	fungus	6	2	2	245
TSO	fungus	6	3	2	245
TSO	fungus	6	4	3	245
TSO	fungus	6	5	8	244
TSO	fungus	6	6	22	239
TSO	fungus	6	7	68	225
TSO	fungus	6	8	115	179
TSO	fungus	6	9	185	132
TSO	fungus	6	10	206	62
TSO	fungus	6	11	225	41
TSO	fungus	6	12	235	22
TSO	fungus	6	13	242	12
TSO	fungus	6	14	235	5
TSO	fungus	6	15	247	3
TSO	fungus	6	16	247	0
TSO	fungus	6	17	247	0
TSO	fungus	6	18	247	0
TSO	fungus	6	19	247	0
TSO	fungus	6	20	247	0
TSO	fungus	7	1	0	212
TSO	fungus	7	2	0	212
TSO	fungus	7	3	0	212
TSO	fungus	7	4	3	212
TSO	fungus	7	5	12	209
TSO	fungus	7	6	45	200
TSO	fungus	7	7	102	167
TSO	fungus	7	8	131	110
TSO	fungus	7	9	172	81
TSO	fungus	7	10	199	40
TSO	fungus	7	11	206	13
TSO	fungus	7	12	209	6
TSO	fungus	7	13	210	3
TSO	fungus	7	14	209	2
TSO	fungus	7	15	211	2
TSO	fungus	7	16	212	1
TSO	fungus	7	17	212	0
TSO	fungus	7	18	212	0
TSO	fungus	7	19	212	0
TSO	fungus	7	20	212	0
TSO	fungus	8	1	5	252
TSO	fungus	8	2	5	247
TSO	fungus	8	3	5	247
TSO	fungus	8	4	8	247
TSO	fungus	8	5	12	244
TSO	fungus	8	6	26	240
TSO	fungus	8	7	54	226
TSO	fungus	8	8	109	198
TSO	fungus	8	9	165	143
TSO	fungus	8	10	208	87
TSO	fungus	8	11	230	44
TSO	fungus	8	12	238	22
TSO	fungus	8	13	243	14
TSO	fungus	8	14	238	9
TSO	fungus	8	15	249	5
TSO	fungus	8	16	251	3
TSO	fungus	8	17	251	1
TSO	fungus	8	18	251	1
TSO	fungus	8	19	251	1
TSO	fungus	8	20	252	1
TSO	fungus	9	1	1	228
TSO	fungus	9	2	3	227
TSO	fungus	9	3	3	225
TSO	fungus	9	4	4	225
TSO	fungus	9	5	10	224
TSO	fungus	9	6	38	218
TSO	fungus	9	7	103	190
TSO	fungus	9	8	153	125
TSO	fungus	9	9	194	75
TSO	fungus	9	10	216	34
TSO	fungus	9	11	224	12
TSO	fungus	9	12	227	4
TSO	fungus	9	13	227	1
TSO	fungus	9	14	227	1
TSO	fungus	9	15	228	0
TSO	fungus	9	16	228	0
TSO	fungus	9	17	228	0
TSO	fungus	9	18	228	0
TSO	fungus	9	19	228	0
TSO	fungus	9	20	228	0
TSO	fungus	10	1	2	247
TSO	fungus	10	2	3	245
TSO	fungus	10	3	3	244
TSO	fungus	10	4	3	244
TSO	fungus	10	5	5	244
TSO	fungus	10	6	22	242
TSO	fungus	10	7	65	225
TSO	fungus	10	8	86	182
TSO	fungus	10	9	158	161
TSO	fungus	10	10	200	89
TSO	fungus	10	11	226	47
TSO	fungus	10	12	235	21
TSO	fungus	10	13	243	12
TSO	fungus	10	14	235	4
TSO	fungus	10	15	246	3
TSO	fungus	10	16	247	1
TSO	fungus	10	17	247	0
TSO	fungus	10	18	247	0
TSO	fungus	10	19	247	0
TSO	fungus	10	20	247	0
TDO	control	11	1	1	227
TDO	control	11	2	1	226
TDO	control	11	3	2	226
TDO	control	11	4	3	225
TDO	control	11	5	3	224
TDO	control	11	6	4	224
TDO	control	11	7	5	223
TDO	control	11	8	5	222
TDO	control	11	9	6	222
TDO	control	11	10	6	221
TDO	control	11	11	6	221
TDO	control	11	12	6	221
TDO	control	11	13	8	221
TDO	control	11	14	6	219
TDO	control	11	15	11	217
TDO	control	11	16	12	216
TDO	control	11	17	14	215
TDO	control	11	18	14	213
TDO	control	11	19	14	213
TDO	control	11	20	18	213
TDO	control	12	1	1	267
TDO	control	12	2	1	266
TDO	control	12	3	5	266
TDO	control	12	4	6	262
TDO	control	12	5	6	261
TDO	control	12	6	7	261
TDO	control	12	7	8	260
TDO	control	12	8	8	259
TDO	control	12	9	12	259
TDO	control	12	10	13	255
TDO	control	12	11	13	254
TDO	control	12	12	15	254
TDO	control	12	13	16	252
TDO	control	12	14	15	251
TDO	control	12	15	19	250
TDO	control	12	16	24	248
TDO	control	12	17	24	243
TDO	control	12	18	28	243
TDO	control	12	19	30	239
TDO	control	12	20	32	237
TDO	control	13	1	6	173
TDO	control	13	2	6	167
TDO	control	13	3	6	167
TDO	control	13	4	9	167
TDO	control	13	5	9	164
TDO	control	13	6	10	164
TDO	control	13	7	11	163
TDO	control	13	8	11	162
TDO	control	13	9	13	162
TDO	control	13	10	14	160
TDO	control	13	11	14	159
TDO	control	13	12	14	159
TDO	control	13	13	15	159
TDO	control	13	14	14	158
TDO	control	13	15	20	157
TDO	control	13	16	22	153
TDO	control	13	17	22	151
TDO	control	13	18	22	151
TDO	control	13	19	24	151
TDO	control	13	20	25	149
TDO	control	14	1	0	237
TDO	control	14	2	5	237
TDO	control	14	3	6	232
TDO	control	14	4	6	231
TDO	control	14	5	6	231
TDO	control	14	6	6	231
TDO	control	14	7	8	231
TDO	control	14	8	8	229
TDO	control	14	9	10	229
TDO	control	14	10	14	227
TDO	control	14	11	16	223
TDO	control	14	12	22	221
TDO	control	14	13	31	215
TDO	control	14	14	22	206
TDO	control	14	15	44	200
TDO	control	14	16	57	193
TDO	control	14	17	61	180
TDO	control	14	18	72	176
TDO	control	14	19	78	165
TDO	control	14	20	84	159
TDO	control	15	1	246	2
TDO	control	15	2	244	3
TDO	control	15	3	243	5
TDO	control	15	4	241	5
TDO	control	15	5	241	6
TDO	control	15	6	240	6
TDO	control	15	7	240	6
TDO	control	15	8	240	7
TDO	control	15	9	239	8
TDO	control	15	10	238	8
TDO	control	15	11	238	9
TDO	control	15	12	237	9
TDO	control	15	13	237	9
TDO	control	15	14	237	9
TDO	control	15	15	237	9
TDO	control	15	16	237	12
TDO	control	15	17	234	12
TDO	control	15	18	234	15
TDO	control	15	19	231	21
TDO	control	15	20	225	26
TDO	fungus	16	1	2	232
TDO	fungus	16	2	3	230
TDO	fungus	16	3	4	229
TDO	fungus	16	4	7	228
TDO	fungus	16	5	12	225
TDO	fungus	16	6	21	220
TDO	fungus	16	7	39	211
TDO	fungus	16	8	74	193
TDO	fungus	16	9	127	158
TDO	fungus	16	10	173	105
TDO	fungus	16	11	204	59
TDO	fungus	16	12	218	28
TDO	fungus	16	13	224	14
TDO	fungus	16	14	218	8
TDO	fungus	16	15	230	5
TDO	fungus	16	16	231	2
TDO	fungus	16	17	232	1
TDO	fungus	16	18	232	0
TDO	fungus	16	19	232	0
TDO	fungus	16	20	232	0
TDO	fungus	17	1	1	241
TDO	fungus	17	2	4	240
TDO	fungus	17	3	5	237
TDO	fungus	17	4	6	236
TDO	fungus	17	5	7	235
TDO	fungus	17	6	23	234
TDO	fungus	17	7	59	218
TDO	fungus	17	8	110	182
TDO	fungus	17	9	156	131
TDO	fungus	17	10	193	85
TDO	fungus	17	11	217	48
TDO	fungus	17	12	226	24
TDO	fungus	17	13	233	15
TDO	fungus	17	14	226	8
TDO	fungus	17	15	238	5
TDO	fungus	17	16	239	3
TDO	fungus	17	17	241	2
TDO	fungus	17	18	241	0
TDO	fungus	17	19	241	0
TDO	fungus	17	20	241	0
TDO	fungus	18	1	4	234
TDO	fungus	18	2	4	230
TDO	fungus	18	3	4	230
TDO	fungus	18	4	6	230
TDO	fungus	18	5	11	228
TDO	fungus	18	6	25	223
TDO	fungus	18	7	54	209
TDO	fungus	18	8	97	180
TDO	fungus	18	9	126	137
TDO	fungus	18	10	171	108
TDO	fungus	18	11	195	63
TDO	fungus	18	12	213	39
TDO	fungus	18	13	225	21
TDO	fungus	18	14	213	9
TDO	fungus	18	15	233	4
TDO	fungus	18	16	233	1
TDO	fungus	18	17	234	1
TDO	fungus	18	18	234	0
TDO	fungus	18	19	234	0
TDO	fungus	18	20	234	0
TDO	fungus	19	1	2	248
TDO	fungus	19	2	4	246
TDO	fungus	19	3	6	244
TDO	fungus	19	4	10	242
TDO	fungus	19	5	17	238
TDO	fungus	19	6	41	231
TDO	fungus	19	7	106	207
TDO	fungus	19	8	164	142
TDO	fungus	19	9	206	84
TDO	fungus	19	10	224	42
TDO	fungus	19	11	241	24
TDO	fungus	19	12	243	7
TDO	fungus	19	13	246	5
TDO	fungus	19	14	243	2
TDO	fungus	19	15	248	2
TDO	fungus	19	16	248	0
TDO	fungus	19	17	248	0
TDO	fungus	19	18	248	0
TDO	fungus	19	19	248	0
TDO	fungus	19	20	248	0
TDO	fungus	20	1	2	261
TDO	fungus	20	2	2	259
TDO	fungus	20	3	2	259
TDO	fungus	20	4	5	259
TDO	fungus	20	5	17	256
TDO	fungus	20	6	46	244
TDO	fungus	20	7	104	215
TDO	fungus	20	8	174	157
TDO	fungus	20	9	219	87
TDO	fungus	20	10	244	42
TDO	fungus	20	11	253	17
TDO	fungus	20	12	257	8
TDO	fungus	20	13	260	4
TDO	fungus	20	14	257	1
TDO	fungus	20	15	261	0
TDO	fungus	20	16	261	0
TDO	fungus	20	17	261	0
TDO	fungus	20	18	261	0
TDO	fungus	20	19	261	0
TDO	fungus	20	20	261	0
